# Supplementary material for: Whole-Genome Sequencing and Drug-Susceptibility Analysis of Serial Mycobacterium abscessus Isolates from Thai Patients
Source: MDPI journal article supplement (doi:10.3390/biology11091319), 2022-09-05
Supplement: s1 [file s1]

**Supplementary Table S1:** Mutation rate, calculated as stated in the text, of serial isolates of *Mycobacterium abscessus*.

| Patient number | Subspecies         | Dates of isolation (dd/mm/yy) | Interval time (from the initial isolate) | SNP differences between successive pairs of isolates | Mutation rate calculated since the initial isolate SNP/genome size (5Mb)/year ( $\times 10^{-6}$ ) | Type of infection |
|----------------|--------------------|-------------------------------|------------------------------------------|------------------------------------------------------|----------------------------------------------------------------------------------------------------|-------------------|
| P1.1           | <i>massiliense</i> | 28/4/14                       | -                                        |                                                      |                                                                                                    | Persistent        |
| P1.2           | <i>massiliense</i> | 13/5/14                       | 15                                       | 6                                                    | 29.200                                                                                             | Persistent        |
| P1.3           | <i>massiliense</i> | 9/6/14                        | 42                                       | 8                                                    | 13.905                                                                                             | Persistent        |
| P1.4           | <i>massiliense</i> | 7/7/14                        | 70                                       | 9                                                    | 9.386                                                                                              | Persistent        |
| P1.5           | <i>massiliense</i> | 16/7/14                       | 79                                       | 8                                                    | 7.392                                                                                              | Persistent        |
| P1.6           | <i>massiliense</i> | 16/10/14                      | 171                                      | 6                                                    | 2.561                                                                                              | Persistent        |
| P1.7           | <i>massiliense</i> | 19/10/14                      | 174                                      | 11                                                   | 4.615                                                                                              | Persistent        |
| P1.8           | <i>massiliense</i> | 22/10/14                      | 177                                      | 8                                                    | 3.299                                                                                              | Persistent        |
| P1.9           | <i>massiliense</i> | 30/11/14                      | 216                                      | 8                                                    | 2.704                                                                                              | Persistent        |
| P3.1           | <i>abscessus</i>   | 23/11/15                      | -                                        |                                                      |                                                                                                    | Colonization      |
| P3.2           | <i>abscessus</i>   | 15/2/16                       | 84                                       | 1                                                    | 0.869                                                                                              | Colonization      |
| P4.1           | <i>massiliense</i> | 9/7/15                        | -                                        |                                                      |                                                                                                    | Persistent        |
| P4.2           | <i>massiliense</i> | 17/7/15                       | 8                                        | 4                                                    | 36.500                                                                                             | Persistent        |
| P6.1           | <i>abscessus</i>   | 12/6/13                       | -                                        |                                                      |                                                                                                    | Persistent        |
| P6.2           | <i>abscessus</i>   | 20/6/13                       | 8                                        | 6                                                    | 54.750                                                                                             | Persistent        |
| P7.1           | <i>massiliense</i> | 6/3/14                        | -                                        |                                                      |                                                                                                    | Persistent        |
| P7.2           | <i>massiliense</i> | 19/5/14                       | 74                                       | 14                                                   | 13.811                                                                                             | Persistent        |
| P8.1           | <i>massiliense</i> | 18/6/13                       | -                                        |                                                      |                                                                                                    | Re-infection      |
| P8.2           | <i>massiliense</i> | 10/9/13                       | 84                                       | 140                                                  | 121.667                                                                                            | Re-infection      |
| P9.1           | <i>massiliense</i> | 2/7/16                        | -                                        |                                                      |                                                                                                    | Persistent        |
| P9.2           | <i>massiliense</i> | 26/7/16                       | 24                                       | 9                                                    | 27.375                                                                                             | Persistent        |
| P9.3           | <i>massiliense</i> | 4/10/16                       | 94                                       | 14                                                   | 10.872                                                                                             | Persistent        |

**Supplementary Table S1:** Mutation rate, calculated as stated in the text, of serial isolates of *Mycobacterium abscessus*. (Cont.)

| Patient number | Subspecies         | Dates of isolation (dd/mm/yy) | Interval time (from the initial isolate) | SNP differences between successive pairs of isolates | Mutation rate calculated since the initial isolate SNP/genome size (5Mb)/year ( $\times 10^{-6}$ ) | Type of infection |
|----------------|--------------------|-------------------------------|------------------------------------------|------------------------------------------------------|----------------------------------------------------------------------------------------------------|-------------------|
| P10.1          | <i>abscessus</i>   | 14/11/12                      | -                                        |                                                      |                                                                                                    | Persistent        |
| P10.2          | <i>abscessus</i>   | 9/4/13                        | 146                                      | 5                                                    | 2.500                                                                                              | Persistent        |
| P10.3          | <i>abscessus</i>   | 25/6/13                       | 223                                      | 6                                                    | 1.964                                                                                              | Persistent        |
| P11.1          | <i>massiliense</i> | 8/7/15                        | -                                        |                                                      |                                                                                                    | Persistent        |
| P11.2          | <i>massiliense</i> | 3/3/16                        | 239                                      | 12                                                   | 3.665                                                                                              | Persistent        |
| P12.1          | <i>massiliense</i> | 23/1/12                       | -                                        |                                                      |                                                                                                    | Persistent        |
| P12.2          | <i>massiliense</i> | 11/5/12                       | 109                                      | 8                                                    | 5.358                                                                                              | Persistent        |
| P13.1          | <i>massiliense</i> | 12/2/15                       | -                                        |                                                      |                                                                                                    | Persistent        |
| P13.2          | <i>massiliense</i> | 17/8/15                       | 186                                      | 11                                                   | 4.317                                                                                              | Persistent        |
| P13.3          | <i>massiliense</i> | 14/1/16                       | 336                                      | 8                                                    | 1.738                                                                                              | Persistent        |
| P14.1          | <i>abscessus</i>   | 9/1/13                        | -                                        |                                                      |                                                                                                    | Persistent        |
| P14.2          | <i>abscessus</i>   | 2013/1/11                     | 2                                        | 1                                                    | 36.500                                                                                             | Persistent        |
| P14.3          | <i>abscessus</i>   | 19/7/13                       | 191                                      | 2                                                    | 0.764                                                                                              | Persistent        |
| P15.1          | <i>massiliense</i> | 17/8/15                       | -                                        |                                                      |                                                                                                    | Persistent        |
| P15.2          | <i>massiliense</i> | 23/5/16                       | 280                                      | 12                                                   | 3.129                                                                                              | Persistent        |
| P15.3          | <i>massiliense</i> | 1/8/16                        | 350                                      | 102                                                  | 21.274                                                                                             | Re-infection      |
| P16.1          | <i>massiliense</i> | 28/6/13                       | -                                        |                                                      |                                                                                                    | Persistent        |
| P16.2          | <i>massiliense</i> | 8/8/14                        | 406                                      | 10                                                   | 1.798                                                                                              | Persistent        |
| P17.1          | <i>abscessus</i>   | 16/2/15                       | -                                        |                                                      |                                                                                                    | Persistent        |
| P17.2          | <i>abscessus</i>   | 30/3/15                       | 42                                       | 3                                                    | 5.214                                                                                              | Persistent        |
| P17.3          | <i>abscessus</i>   | 12/5/15                       | 85                                       | 6                                                    | 5.153                                                                                              | Persistent        |
| P18.1          | <i>massiliense</i> | 30/7/13                       | -                                        |                                                      |                                                                                                    | Colonization      |
| P18.2          | <i>massiliense</i> | 29/8/14                       | 395                                      | 5                                                    | 0.924                                                                                              | Colonization      |
| P19.1          | <i>abscessus</i>   | 22/8/12                       | -                                        |                                                      |                                                                                                    | Persistent        |
| P19.2          | <i>abscessus</i>   | 12/6/14                       | 659                                      | 5                                                    | 0.554                                                                                              | Persistent        |

**Supplementary Table S1:** Mutation rate, calculated as stated in the text, of serial isolates of *Mycobacterium abscessus*. (Cont.)

| Patient number | Subspecies         | Dates of isolation (dd/mm/yy) | Interval time (from the initial isolate) | SNP differences between successive pairs of isolates | Mutation rate calculated since the initial isolate SNP/genome size (5Mb)/year ( $\times 10^{-6}$ ) | Type of infection |
|----------------|--------------------|-------------------------------|------------------------------------------|------------------------------------------------------|----------------------------------------------------------------------------------------------------|-------------------|
| P20.1          | <i>abscessus</i>   | 24/6/14                       | -                                        |                                                      |                                                                                                    | Colonization      |
| P20.2          | <i>abscessus</i>   | 21/10/14                      | 119                                      | 5                                                    | 3.067                                                                                              | Colonization      |
| P21.1          | <i>massiliense</i> | 28/9/12                       | -                                        |                                                      |                                                                                                    | Persistent        |
| P21.2          | <i>massiliense</i> | 4/10/12                       | 6                                        | 11                                                   | 133.833                                                                                            | Persistent        |
| P22.1          | <i>massiliense</i> | 9/10/14                       | -                                        |                                                      |                                                                                                    | Persistent        |
| P22.2          | <i>massiliense</i> | 29/1/15                       | 112                                      | 8                                                    | 5.214                                                                                              | Persistent        |
| P23.1          | <i>abscessus</i>   | 6/12/12                       | -                                        |                                                      |                                                                                                    | Persistent        |
| P23.2          | <i>abscessus</i>   | 7/12/12                       | 1                                        | 0                                                    | 0.000                                                                                              | Persistent        |
| P24.1          | <i>abscessus</i>   | 5/10/14                       | -                                        |                                                      |                                                                                                    | Colonization      |
| P24.2          | <i>abscessus</i>   | 7/10/14                       | 2                                        | 4                                                    | 146.000                                                                                            | Colonization      |
| P24.3          | <i>abscessus</i>   | 8/10/14                       | 3                                        | 2                                                    | 48.667                                                                                             | Colonization      |
| P24.4          | <i>abscessus</i>   | 10/10/14                      | 5                                        | 5                                                    | 73.000                                                                                             | Colonization      |
| P25.1          | <i>abscessus</i>   | 30/1/12                       | -                                        |                                                      |                                                                                                    | Persistent        |
| P25.2          | <i>abscessus</i>   | 31/1/12                       | 1                                        | 3                                                    | 219.000                                                                                            | Persistent        |
| P26.1          | <i>abscessus</i>   | 23/3/15                       | -                                        |                                                      |                                                                                                    | Persistent        |
| P26.2          | <i>abscessus</i>   | 27/3/15                       | 4                                        | 6                                                    | 109.500                                                                                            | Persistent        |
| P27.1          | <i>abscessus</i>   | 25/4/16                       | -                                        |                                                      |                                                                                                    | Persistent        |
| P27.2          | <i>abscessus</i>   | 1/6/16                        | 37                                       | 6                                                    | 11.838                                                                                             | Persistent        |
| P27.3          | <i>abscessus</i>   | 26/6/17                       | 427                                      | 0                                                    | 0.000                                                                                              | Persistent        |
| P28.1          | <i>massiliense</i> | 30/6/17                       | -                                        |                                                      |                                                                                                    | Persistent        |
| P28.2          | <i>massiliense</i> | 23/7/17                       | 23                                       | 12                                                   | 38.087                                                                                             | Persistent        |
| P28.3          | <i>massiliense</i> | 30/7/17                       | 30                                       | 8                                                    | 19.467                                                                                             | Persistent        |

**Supplementary Table S2:** Estimation of *Mycobacterium abscessus* mutation rates at different time intervals relative to the initial isolate.

the initial isolate.

| Subsp.             | No. of SNPs | Interval time (days) | Mutation rate ( $\times 10^{-6}$ ) | Mutation rate ( $\times 10^{-6}$ ), Mean (SD) |
|--------------------|-------------|----------------------|------------------------------------|-----------------------------------------------|
| $\leq 7$ days      |             |                      |                                    |                                               |
| <i>abscessus</i>   | 1           | 2                    | 36.50                              | 127.75 (164.59)                               |
| <i>abscessus</i>   | 0           | 1                    | 0.00                               |                                               |
| <i>abscessus</i>   | 5           | 1                    | 365.00                             |                                               |
| <i>abscessus</i>   | 6           | 4                    | 109.50                             |                                               |
| <i>massiliense</i> | 11          | 6                    | 133.83                             | 133.83 (0.00)                                 |
| 8–30 days          |             |                      |                                    |                                               |
| <i>abscessus</i>   | 6           | 8                    | 54.75                              | 54.75                                         |
| <i>massiliense</i> | 6           | 15                   | 29.20                              | 30.13 (7.52)                                  |
| <i>massiliense</i> | 4           | 8                    | 36.50                              |                                               |
| <i>massiliense</i> | 9           | 24                   | 27.38                              |                                               |
| <i>massiliense</i> | 12          | 23                   | 38.09                              |                                               |
| <i>massiliense</i> | 8           | 30                   | 19.47                              |                                               |
| 31–180 days        |             |                      |                                    |                                               |
| <i>abscessus</i>   | 5           | 146                  | 2.50                               | 6.18 (3.98)                                   |
| <i>abscessus</i>   | 3           | 42                   | 5.21                               |                                               |
| <i>abscessus</i>   | 6           | 85                   | 5.15                               |                                               |
| <i>abscessus</i>   | 6           | 37                   | 11.84                              |                                               |
| <i>massiliense</i> | 8           | 42                   | 13.90                              | 7.64 (4.16)                                   |
| <i>massiliense</i> | 9           | 70                   | 9.39                               |                                               |
| <i>massiliense</i> | 8           | 79                   | 7.39                               |                                               |
| <i>massiliense</i> | 6           | 171                  | 2.56                               |                                               |
| <i>massiliense</i> | 11          | 174                  | 4.61                               |                                               |
| <i>massiliense</i> | 8           | 177                  | 3.30                               |                                               |
| <i>massiliense</i> | 14          | 74                   | 13.81                              |                                               |
| <i>massiliense</i> | 14          | 94                   | 10.87                              |                                               |
| <i>massiliense</i> | 8           | 109                  | 5.36                               |                                               |
| <i>massiliense</i> | 8           | 112                  | 5.21                               |                                               |
|                    |             |                      |                                    |                                               |

**Supplementary Table S2:** Estimation of *Mycobacterium abscessus* mutation rates at different time intervals relative to the initial isolate. (Cont.)

| Subsp.               | No. of SNPs | Interval time (days) | Mutation rate ( $\times 10^{-6}$ ) | Mutation rate ( $\times 10^{-6}$ ),<br>Mean (SD) |
|----------------------|-------------|----------------------|------------------------------------|--------------------------------------------------|
| <b>&gt; 180 days</b> |             |                      |                                    |                                                  |
| <i>abscessus</i>     | 6           | 223                  | 1.96                               | 0.82 (0.83)                                      |
| <i>abscessus</i>     | 2           | 191                  | 0.76                               |                                                  |
| <i>abscessus</i>     | 5           | 659                  | 0.55                               |                                                  |
| <i>abscessus</i>     | 0           | 427                  | 0.00                               |                                                  |
| <i>massiliense</i>   | 8           | 216                  | 2.70                               | 2.89 (1.02)                                      |
| <i>massiliense</i>   | 12          | 239                  | 3.67                               |                                                  |
| <i>massiliense</i>   | 11          | 186                  | 4.32                               |                                                  |
| <i>massiliense</i>   | 8           | 336                  | 1.74                               |                                                  |
| <i>massiliense</i>   | 12          | 280                  | 3.13                               |                                                  |
| <i>massiliense</i>   | 10          | 406                  | 1.80                               |                                                  |

*Note: mutation rate was calculated based on SNP/genome size (5Mb)/year*

**Confirmatory analysis in Patient 1 with 8 serially isolated strains**

| No. of SNPs | Interval time (days) | Mutation rate ( $\times 10^{-6}$ ) |
|-------------|----------------------|------------------------------------|
| 6           | 15                   | 29.20                              |
| 8           | 42                   | 13.90                              |
| 9           | 70                   | 9.39                               |
| 8           | 79                   | 7.39                               |
| 6           | 171                  | 2.56                               |
| 11          | 174                  | 4.61                               |
| 8           | 177                  | 3.30                               |
| 8           | 216                  | 2.70                               |

**Supplementary Table S3.** Frequency and MIC-distribution of isolates with drug resistance-conferring mutations.

| Drug              | Mutations                            | MIC (µg/mL) distribution for relevant isolate |      |      |     |    |    |     |     |    |     | No. of isolates |
|-------------------|--------------------------------------|-----------------------------------------------|------|------|-----|----|----|-----|-----|----|-----|-----------------|
| Clarithromycin    |                                      | ≤0.06                                         | 0.12 | 0.25 | 0.5 | 1  | 2  | 4   | 8   | 16 | >16 |                 |
| (CC = 0.25 µg/ml) | No known CLA mutations               | 1                                             | 2    | 5    | 6   | 6  | 3  | 3   |     | 2  |     | 28              |
|                   | <i>erm(41)</i> T28                   |                                               |      |      |     |    |    |     | 3   | 19 | 10  | 32              |
|                   | <i>rrl</i> A2058G                    |                                               |      |      |     |    |    |     |     |    | 6   | 6               |
|                   | <i>rrl</i> A2059C                    |                                               |      |      |     |    |    |     |     | 2  |     | 2               |
|                   | <i>rrl</i> A2059G                    |                                               |      |      |     |    |    |     |     |    | 1   | 1               |
| Amikacin          |                                      | ≤1                                            | 2    | 4    | 8   | 16 | 32 | 64  | >64 |    |     |                 |
|                   | No known AMK mutations               |                                               | 2    | 18   | 32  | 9  | 5  | 3   |     |    |     | 69              |
| Ciprofloxacin     |                                      | ≤0.12                                         | 0.25 | 0.5  | 1   | 2  | 4  | >4  |     |    |     |                 |
| (CC = 4 µg/ml)    | No known CIP mutations               |                                               |      |      |     |    | 28 | 3   |     |    |     | 31              |
|                   | <i>gyrB</i> C-41G                    |                                               |      |      |     |    | 8  | 4   |     |    |     | 12              |
|                   | <i>gyrB</i> A-78G                    |                                               |      |      |     |    | 20 | 6   |     |    |     | 26              |
| Linezolid         |                                      | ≤1                                            | 2    | 4    | 8   | 16 | 32 | >32 |     |    |     |                 |
| (CC = 2 µg/ml)    | No known LZD mutations               |                                               |      | 3    | 3   | 7  | 18 |     |     |    |     | 31              |
|                   | <i>rrl</i> C742T                     |                                               |      |      |     |    | 3  |     |     |    |     | 3               |
|                   | <i>rrl</i> A1717G                    |                                               |      | 3    | 3   | 6  | 16 |     |     |    |     | 28              |
|                   | <i>rrl</i> C742T & <i>rrl</i> A1717G |                                               | 2    | 2    |     |    |    |     |     |    |     | 4               |
|                   | <i>rrl</i> C3042T                    |                                               |      |      | 1   | 1  | 1  |     |     |    |     | 3               |

**Supplementary Table S4** Literature of Mutation associated *M. abscessus* drug resistance

| Antibiotics    | Genes          | <i>E.coli</i><br>numbering | <i>M.abscessus</i><br>numbering | Remark | Ref   |
|----------------|----------------|----------------------------|---------------------------------|--------|-------|
| Amikacin       | <i>rrs</i>     |                            | A-33G                           |        | [1]   |
|                |                | T1406A                     | T1372A                          |        | [2]   |
|                |                | A1408G                     | A1374G                          |        | [1,2] |
|                |                | C1409T                     | C1375T                          |        | [2]   |
|                |                | G1491T                     | G1455T                          |        | [2]   |
|                |                | C1496T                     | C1460T                          |        | [3]   |
|                |                | T1498A                     | T1462A                          |        | [3]   |
| Clarithromycin | <i>erm(41)</i> |                            | A-31T                           |        | [1]   |
|                |                |                            | C28T                            |        | [4-6] |
|                | <i>rrl</i>     |                            | G795A                           |        | [1]   |
|                |                |                            | T371C                           |        | [1]   |
|                |                |                            | T1401C                          |        | [1]   |
|                |                |                            | A1932G                          |        | [1]   |
|                |                |                            | A2039C                          |        | [1]   |
|                |                | A2057G                     | A2269G                          |        | [1]   |
|                |                | A2058G                     | A2270G                          |        | [7,8] |
|                |                | A2058C                     | A2270C                          |        | [7,8] |
|                |                | A2058T                     | A2270T                          |        | [7,8] |
|                |                | A2059T                     | A2271T                          |        | [7,8] |
|                |                | G2067A                     | G2279A                          |        | [1]   |

| Antibiotics    | Genes                    | <i>E.coli</i><br>numbering | <i>M.abscessus</i><br>numbering | Remark        | Ref  |
|----------------|--------------------------|----------------------------|---------------------------------|---------------|------|
| Clarithromycin | <i>rrl</i>               | A2069A                     | G2281A                          |               | [1]  |
|                |                          | A2082C                     | A2293C                          |               | [1]  |
| Ciprofloxacin  | <i>gyrA</i>              | C275T                      | Ala92Val                        |               | [9]  |
|                |                          | G286A                      | Asp96Asn                        |               | [9]  |
|                |                          | T2287C                     | Ser763Pro                       |               | [1]  |
| Ciprofloxacin  | <i>gyrB</i>              |                            | C-41G                           |               | [1]  |
|                |                          |                            | A-78G                           |               | [1]  |
|                |                          |                            | C1474T                          | Arg492Cys     | [9]  |
|                |                          |                            | C1727G                          | Thr576Ser     | [1]  |
| Linezolid      | <i>rplC</i> (L3)         |                            | T54A                            |               | [10] |
| Linezolid      | <i>rplD</i> (L4)         |                            | G142A                           |               | [10] |
|                |                          |                            | A175P                           |               | [10] |
| Linezolid      | <i>rrl</i><br>(23S rRNA) |                            | G15A                            | Only R strain | [10] |
|                |                          |                            | T328C                           | Only R strain | [10] |
|                |                          |                            | G348A                           | Only R strain | [10] |
|                |                          |                            | C1445T                          | Only R strain | [10] |
|                |                          |                            | C1582A                          | Only R strain | [10] |
|                |                          |                            | T2138C                          | Only R strain | [10] |
|                |                          |                            | A2271C                          | Only R strain | [10] |
|                |                          |                            | C2432T                          | Only R strain | [10] |
|                |                          |                            | G3048A                          | Only R strain | [10] |



| Antibiotics | Genes                    | <i>E.coli</i><br>numbering | <i>M.abscessus</i><br>numbering | Remark     | Ref  |
|-------------|--------------------------|----------------------------|---------------------------------|------------|------|
| Linezolid   | <i>rrl</i><br>(23S rRNA) |                            | T54A                            | R+S strain | [10] |
|             |                          |                            | C109T                           | R+S strain | [10] |
|             |                          |                            | G399A                           | R+S strain | [10] |
|             |                          |                            | A437G                           | R+S strain | [10] |
|             |                          |                            | C633T                           | R+S strain | [10] |
|             |                          |                            | C742T                           | R+S strain | [10] |
|             |                          |                            | A1717G                          | R+S strain | [10] |
|             |                          |                            | A2270C                          | R+S strain | [10] |
|             |                          |                            | T3001C                          | R+S strain | [10] |
|             |                          |                            | C3042T                          | R+S strain | [10] |

## References

1. Lipworth, S.; Hough, N.; Leach, L.; Morgan, M.; Jeffery, K.; Andersson, M.; Robinson, E.; Smith, E.G.; Crook, D.; Peto, T.; et al. Whole-Genome Sequencing for Predicting Clarithromycin Resistance in *Mycobacterium abscessus*. *Antimicrobial agents and chemotherapy* **2019**, *63*(1), e01204-18, doi:10.1128/aac.01204-18.
2. Nessar, R.; Reyrat, J.M.; Murray, A.; Gicquel, B. Genetic analysis of new 16S rRNA mutations conferring aminoglycoside resistance in *Mycobacterium abscessus*. *The Journal of antimicrobial chemotherapy* **2011**, *66*, 1719-1724, doi:10.1093/jac/dkr209.
3. Kim, S.-Y.; Kim, D.H.; Moon, S.M.; Song, J.Y.; Huh, H.J.; Lee, N.Y.; Shin, S.J.; Koh, W.-J.; Jhun, B.W. Association between 16S rRNA gene mutations and susceptibility to amikacin in *Mycobacterium avium* Complex and *Mycobacterium abscessus* clinical isolates. *Sci Rep* **2021**, *11*, 6108-6108, doi:10.1038/s41598-021-85721-5.

4. Kim, S.Y.; Kim, C.K.; Bae, I.K.; Jeong, S.H.; Yim, J.J.; Jung, J.Y.; Park, M.S.; Kim, Y.S.; Kim, S.K.; Chang, J.; et al. The drug susceptibility profile and inducible resistance to macrolides of *Mycobacterium abscessus* and *Mycobacterium massiliense* in Korea. *Diagnostic microbiology and infectious disease* **2015**, *81*, 107-111, doi:10.1016/j.diagmicrobio.2014.10.007.
5. Rubio, M.; March, F.; Garrigó, M.; Moreno, C.; Español, M.; Coll, P. Inducible and Acquired Clarithromycin Resistance in the *Mycobacterium abscessus* Complex. *PloS one* **2015**, *10*, e0140166, doi:10.1371/journal.pone.0140166.
6. Nash, K.A.; Brown-Elliott, B.A.; Wallace, R.J., Jr. A novel gene, erm(41), confers inducible macrolide resistance to clinical isolates of *Mycobacterium abscessus* but is absent from *Mycobacterium chelonae*. *Antimicrobial agents and chemotherapy* **2009**, *53*, 1367-1376, doi:10.1128/aac.01275-08.
7. Wallace, R.J., Jr.; Meier, A.; Brown, B.A.; Zhang, Y.; Sander, P.; Onyi, G.O.; Böttger, E.C. Genetic basis for clarithromycin resistance among isolates of *Mycobacterium chelonae* and *Mycobacterium abscessus*. *Antimicrobial agents and chemotherapy* **1996**, *40*, 1676-1681, doi:10.1128/aac.40.7.1676.
8. Pfister, P.; Jenni, S.; Poehlsgaard, J.; Thomas, A.; Douthwaite, S.; Ban, N.; Böttger, E.C. The structural basis of macrolide-ribosome binding assessed using mutagenesis of 23S rRNA positions 2058 and 2059. *Journal of molecular biology* **2004**, *342*, 1569-1581, doi:10.1016/j.jmb.2004.07.095.
9. Lee, S.H.; Yoo, H.K.; Kim, S.H.; Koh, W.-J.; Kim, C.K.; Park, Y.K.; Kim, H.J. The drug resistance profile of *Mycobacterium abscessus* group strains from Korea. *Ann Lab Med* **2014**, *34*, 31-37, doi:10.3343/alm.2014.34.1.31.
10. Kim, S.Y.; Jhun, B.W.; Moon, S.M.; Jeon, K.; Kwon, O.J.; Huh, H.J.; Lee, N.Y.; Shin, S.J.; Daley, C.L.; Koh, W.J. Genetic mutations in linezolid-resistant *Mycobacterium avium* complex and *Mycobacterium abscessus* clinical isolates. *Diagnostic microbiology and infectious disease* **2019**, *94*, 38-40, doi:10.1016/j.diagmicrobio.2018.10.022.
